# Supplementary material for: Nano-size layered manganese–calcium oxide as an efficient and biomimetic catalyst for water oxidation under acidic conditions: comparable to platinum
Source: Royal Society of Chemistry journal article supplement (doi:10.1039/c3dt32864c), 2013-01-01
Supplement: c3dt32864c.pdf [file c3dt32864c.pdf]

# Supplementary Information

## **Nano-size layered manganese-calcium oxide as an efficient and biomimetic catalyst for water oxidation under acidic conditions: comparable to platinum**

**Mohammad Mahdi Najafpour<sup>1,2\*</sup>, Kevin Leonard<sup>3</sup>, Fu-Ren F. Fan<sup>3</sup>, Mahmoud Amouzadeh Tabrizi<sup>1</sup>, Allen J. Bard<sup>3\*</sup>, Cecil K. King'ondeu<sup>4</sup> and Steven L. Suib<sup>4,5</sup>, Behzad Haghighi<sup>1,2</sup>, Suleyman I. Allakhverdiev<sup>6,7</sup>**

<sup>1</sup>*Department of Chemistry, Institute for Advanced Studies in Basic Sciences (IASBS), Zanjan, 45137-66731, Iran*

<sup>2</sup>*Center of Climate Change and Global Warming, Institute for Advanced Studies in Basic Sciences (IASBS), Iran.*

<sup>3</sup>*Center for Electrochemistry, Department of Chemistry and Biochemistry, The University of Texas at Austin, Austin, TX, 78712-0165, USA*

<sup>4</sup>*Department of Chemistry, University of Connecticut, 55 N. Eagleville Rd., Unit 3060, Storrs, CT 06269-3060, USA.*

<sup>5</sup>*Institute of Materials Science, University of Connecticut, Storrs, CT 06269, USA*

<sup>6</sup>*Controlled Photobiosynthesis Laboratory, Institute of Plant Physiology, Russian Academy of Sciences, Botanicheskaya Street 35, Moscow 127276, Russia*

<sup>7</sup>*Institute of Basic Biological Problems, Russian Academy of Sciences, Pushchino, Moscow Region 142290, Russia*

\*Corresponding authors; Phone: (+98) 241 415 3201; Fax: (+98) 241 415 3232; E-mail: mmnajafpour@iasbs.ac.ir (MMN); Phone: (+7) 496 7731 837; Fax: (+7) 496 7330 532.

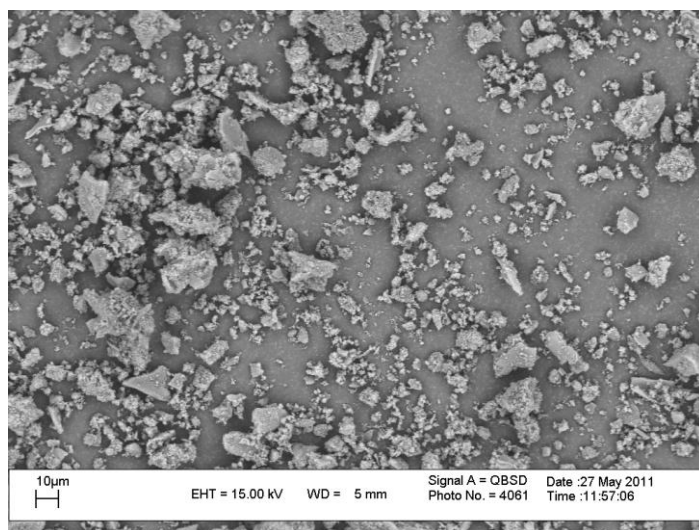

a

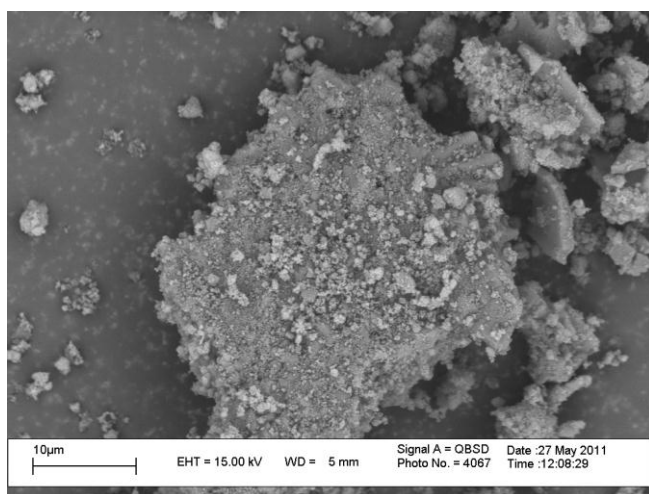

b

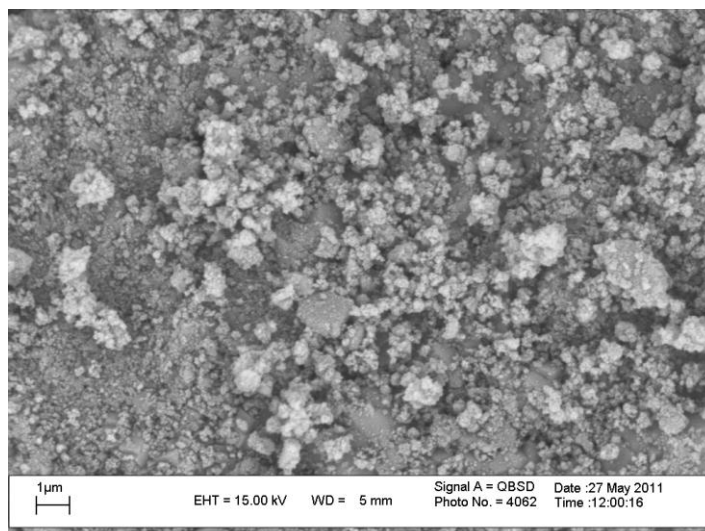

c

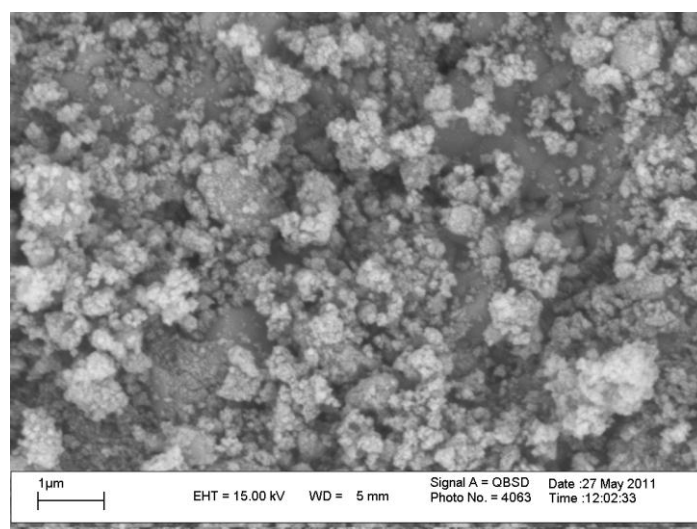

d

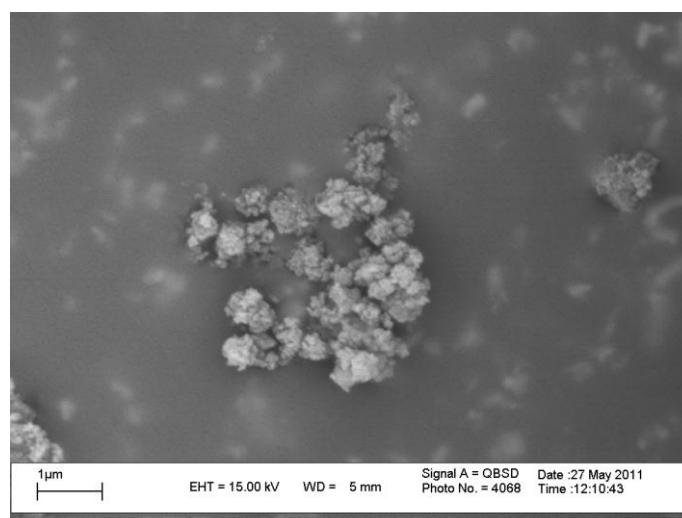

e

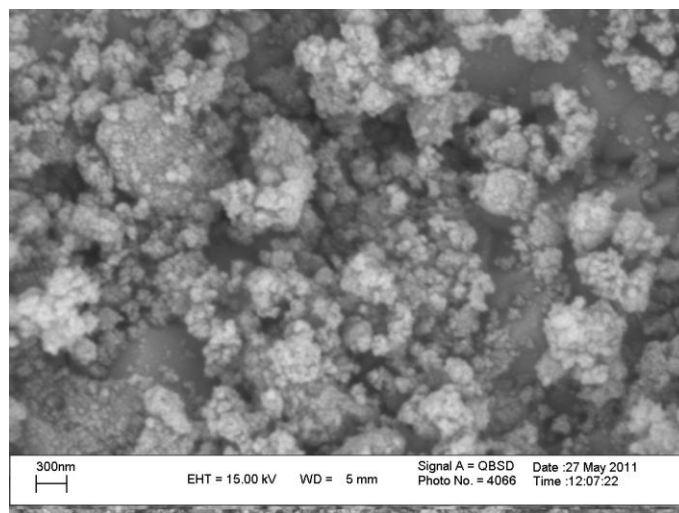

f

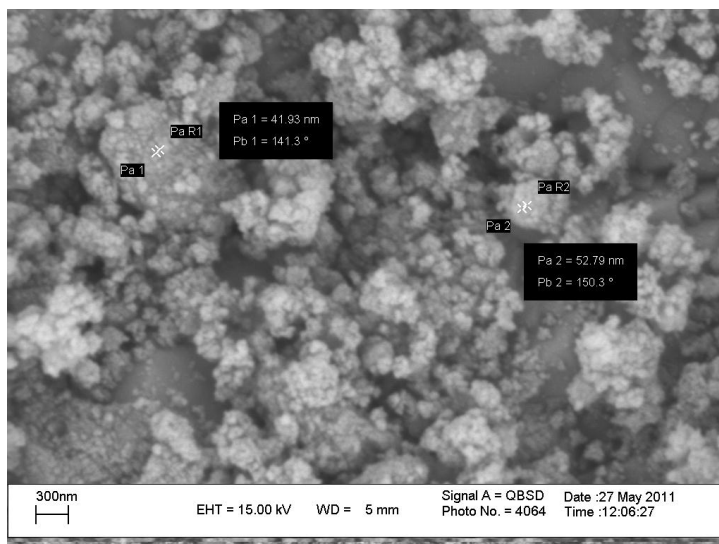

g

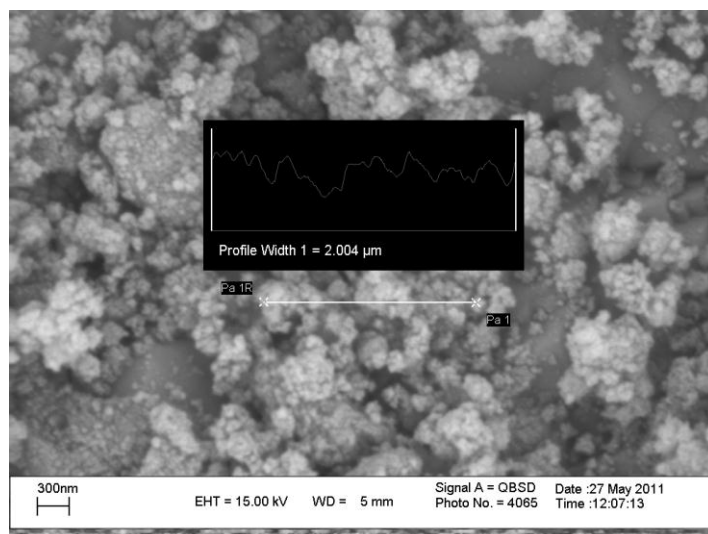

h

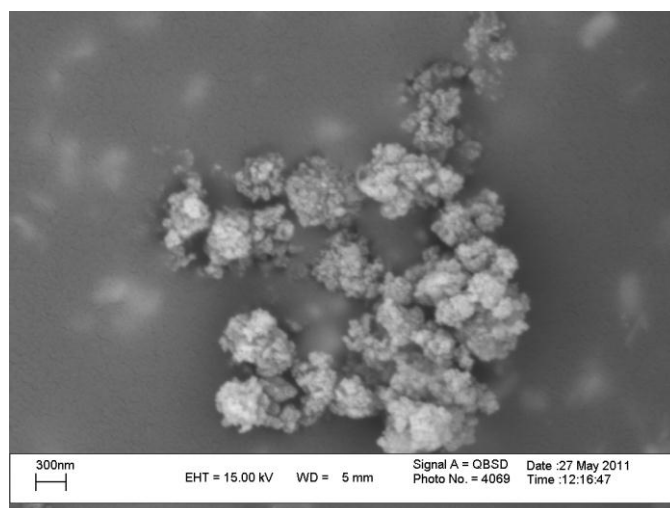

i

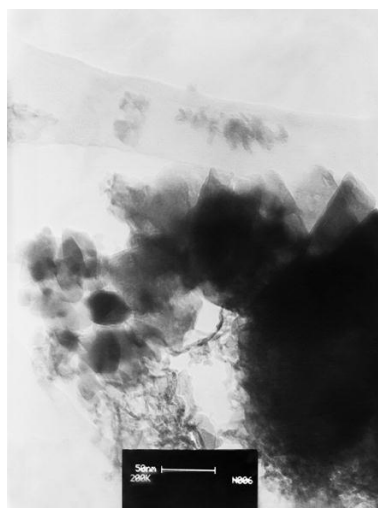

g

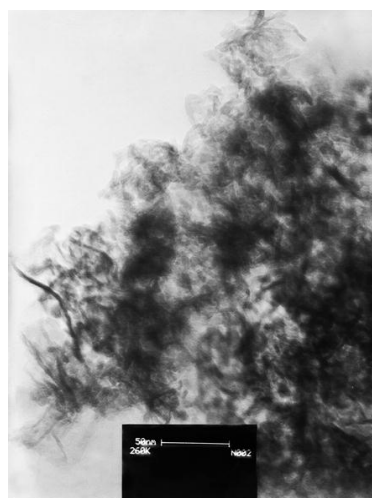

h



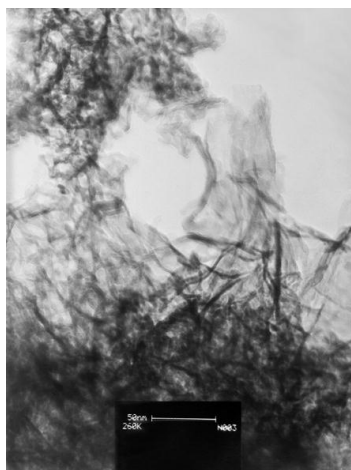

k

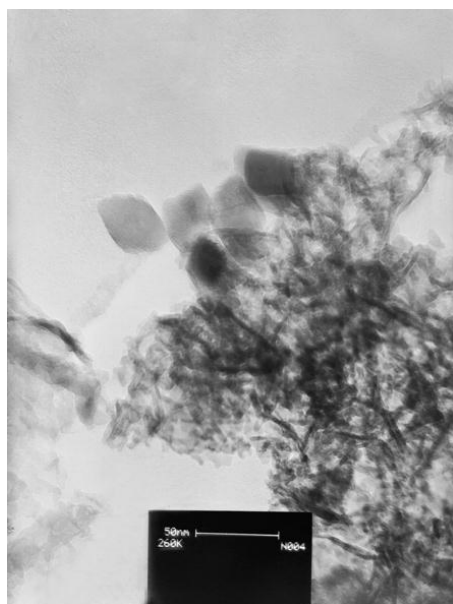

l

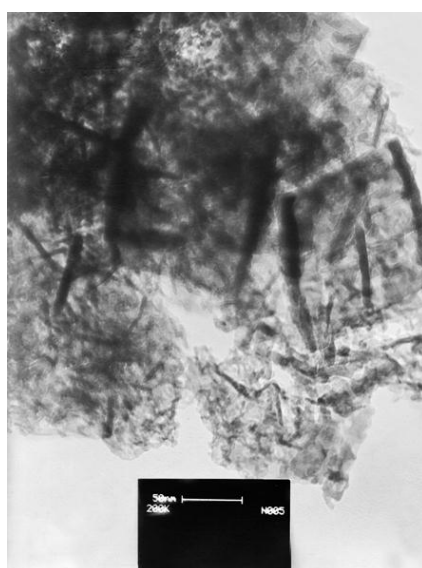

7

**m**

**Fig. S1.** SEM micrographs of nano size manganese calcium oxide (a-i). TEM images of nano size manganese calcium oxide (g-m). Scale bar for all TEM images (g-m) is 50 nm.



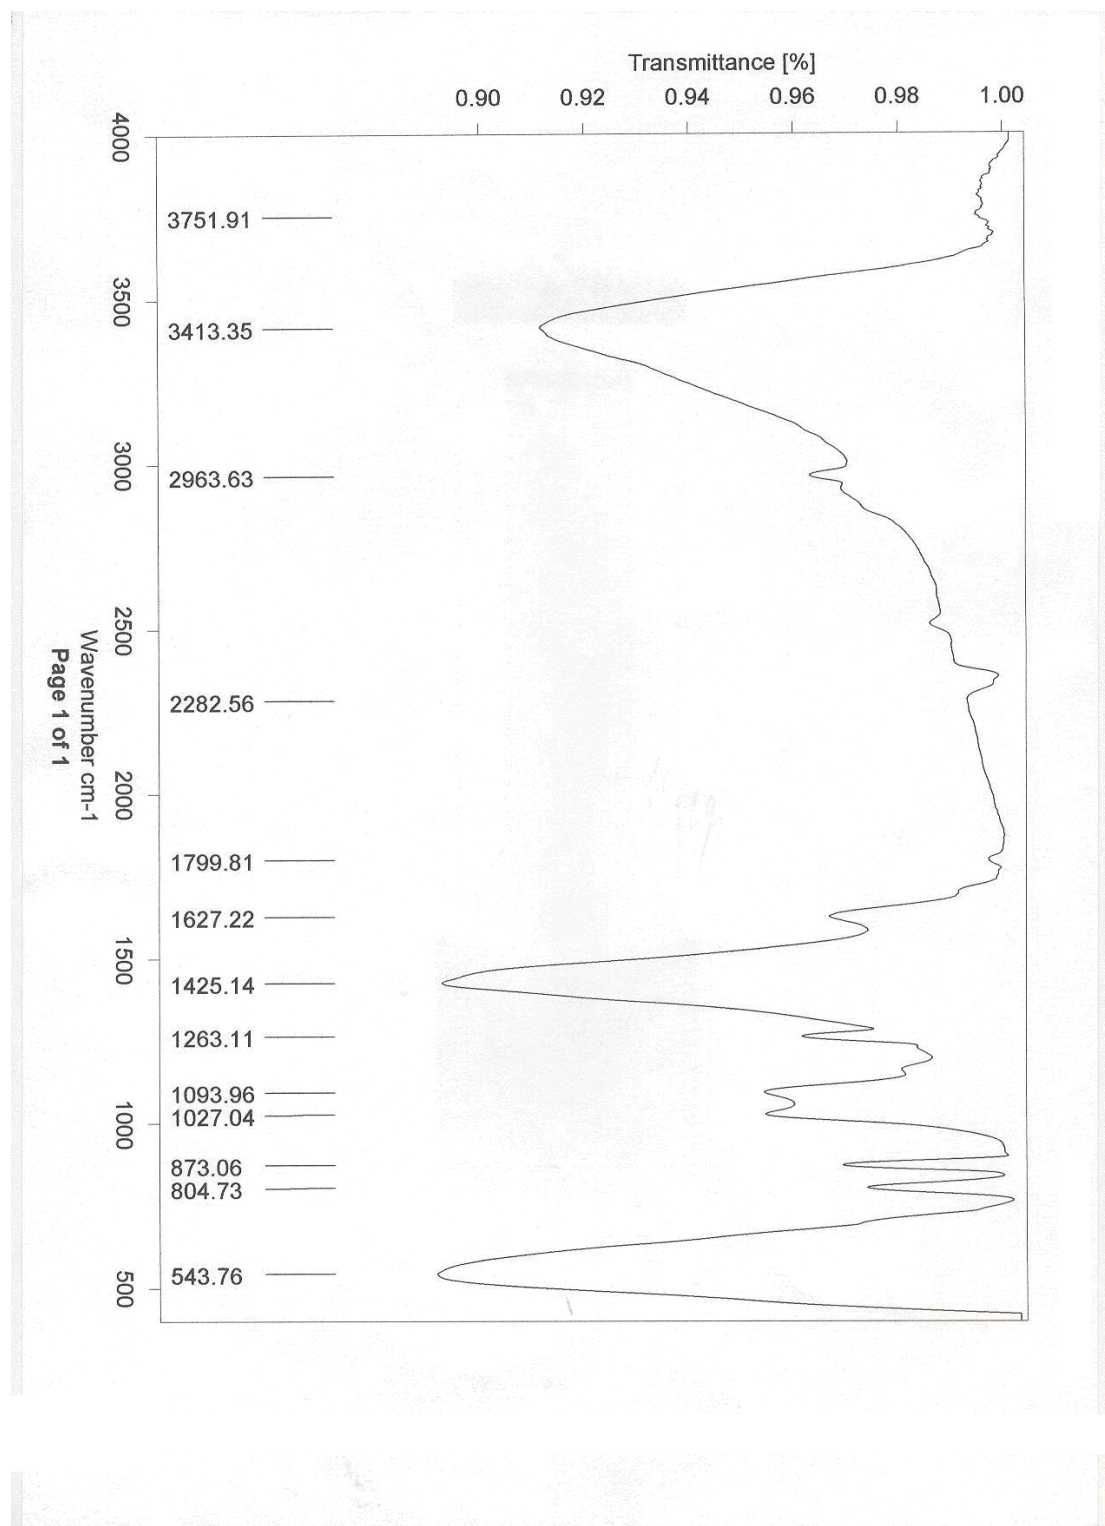

**Fig. S2.** IR spectrum of the nano-size manganese-calcium oxide.
